# Supplementary material for: Technique for comparison of backscatter coefficients derived from in-situ cloud probe measurements with concurrent airborne Lidar
Source: Copernicus journal article supplement (doi:10.5194/amt-2022-87), 2022-05-19

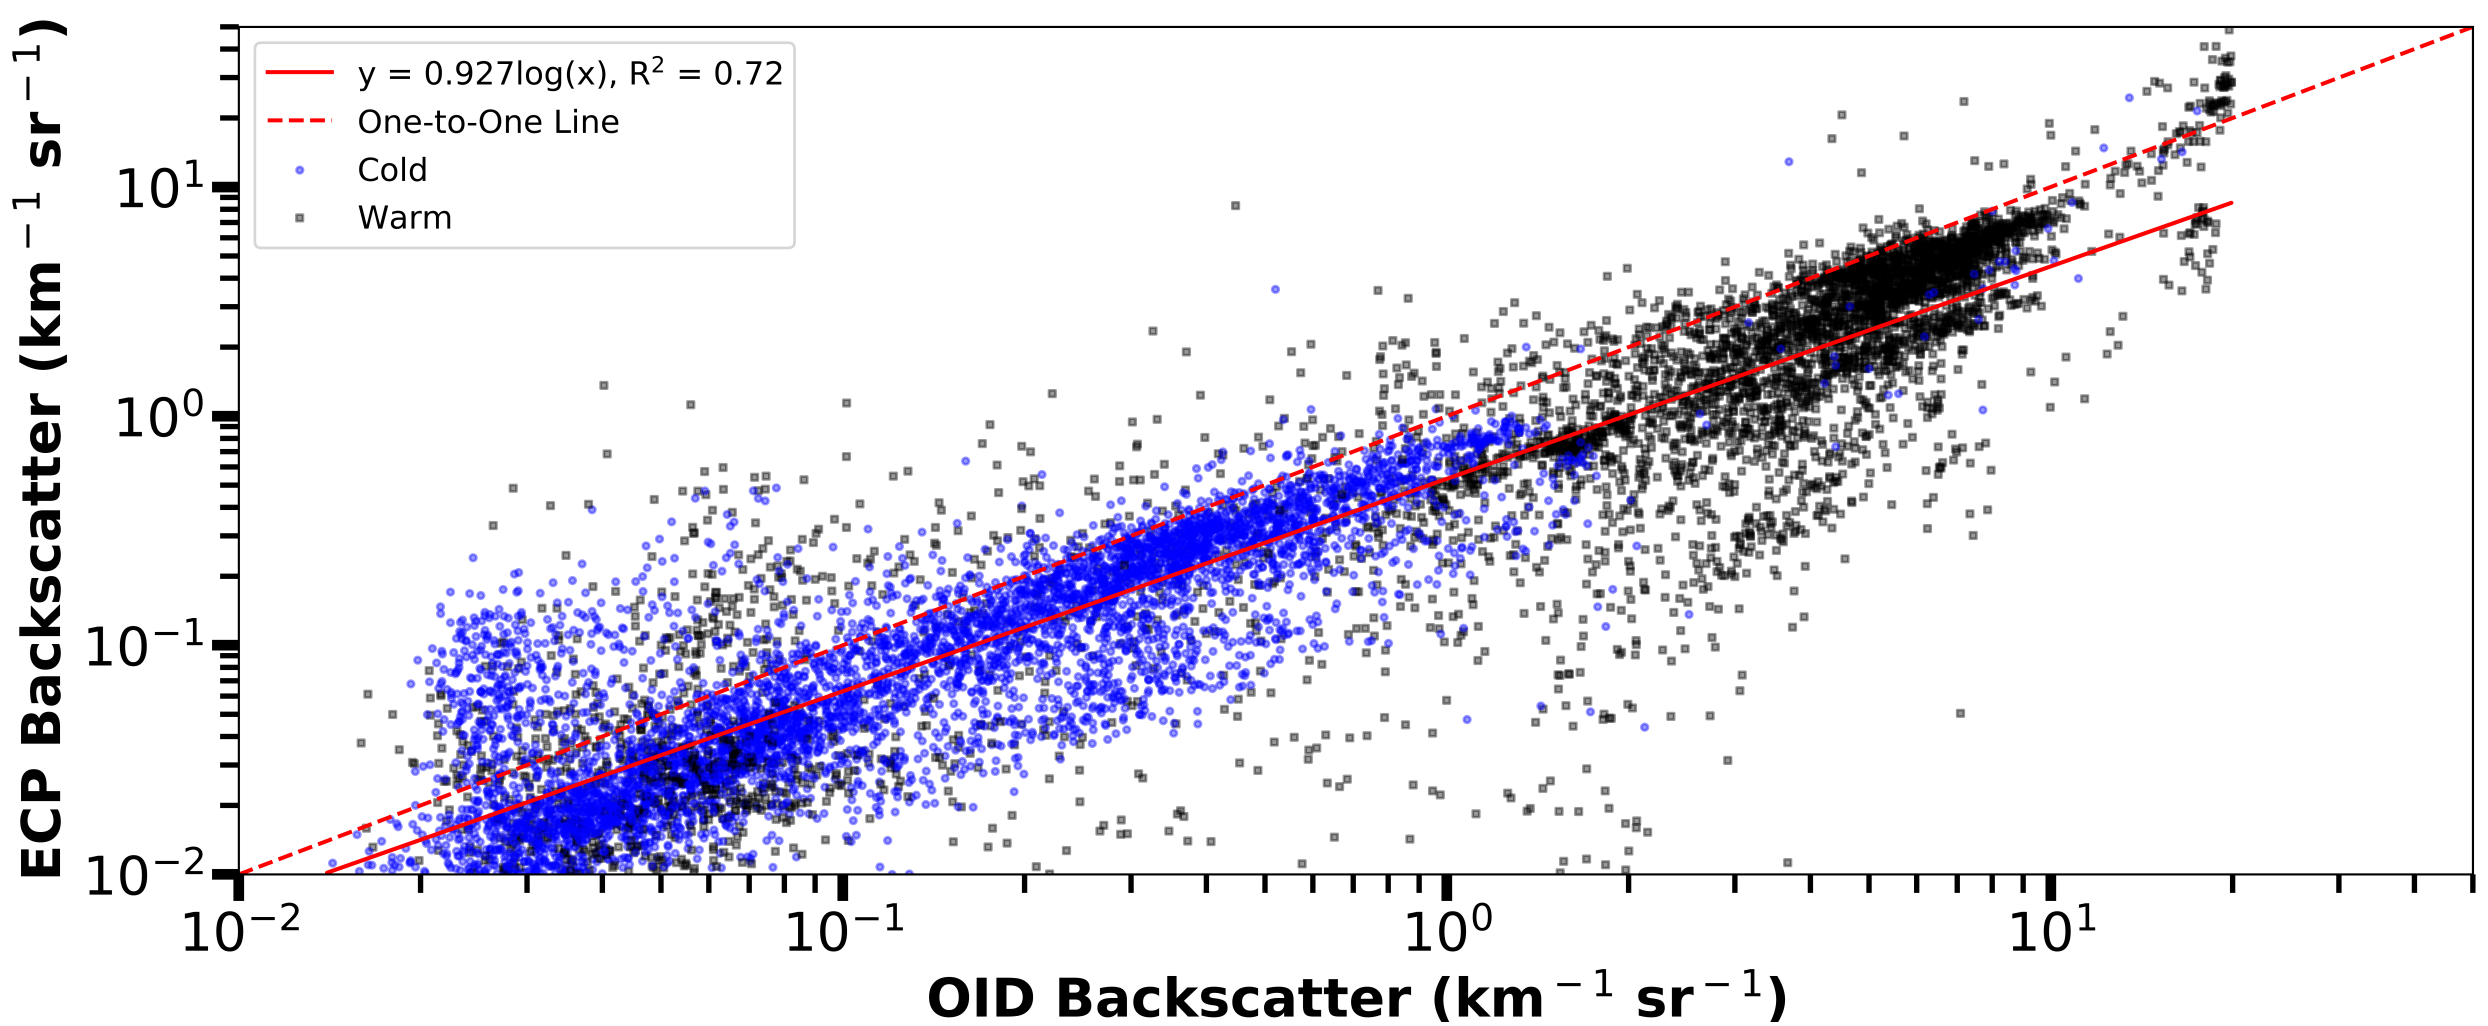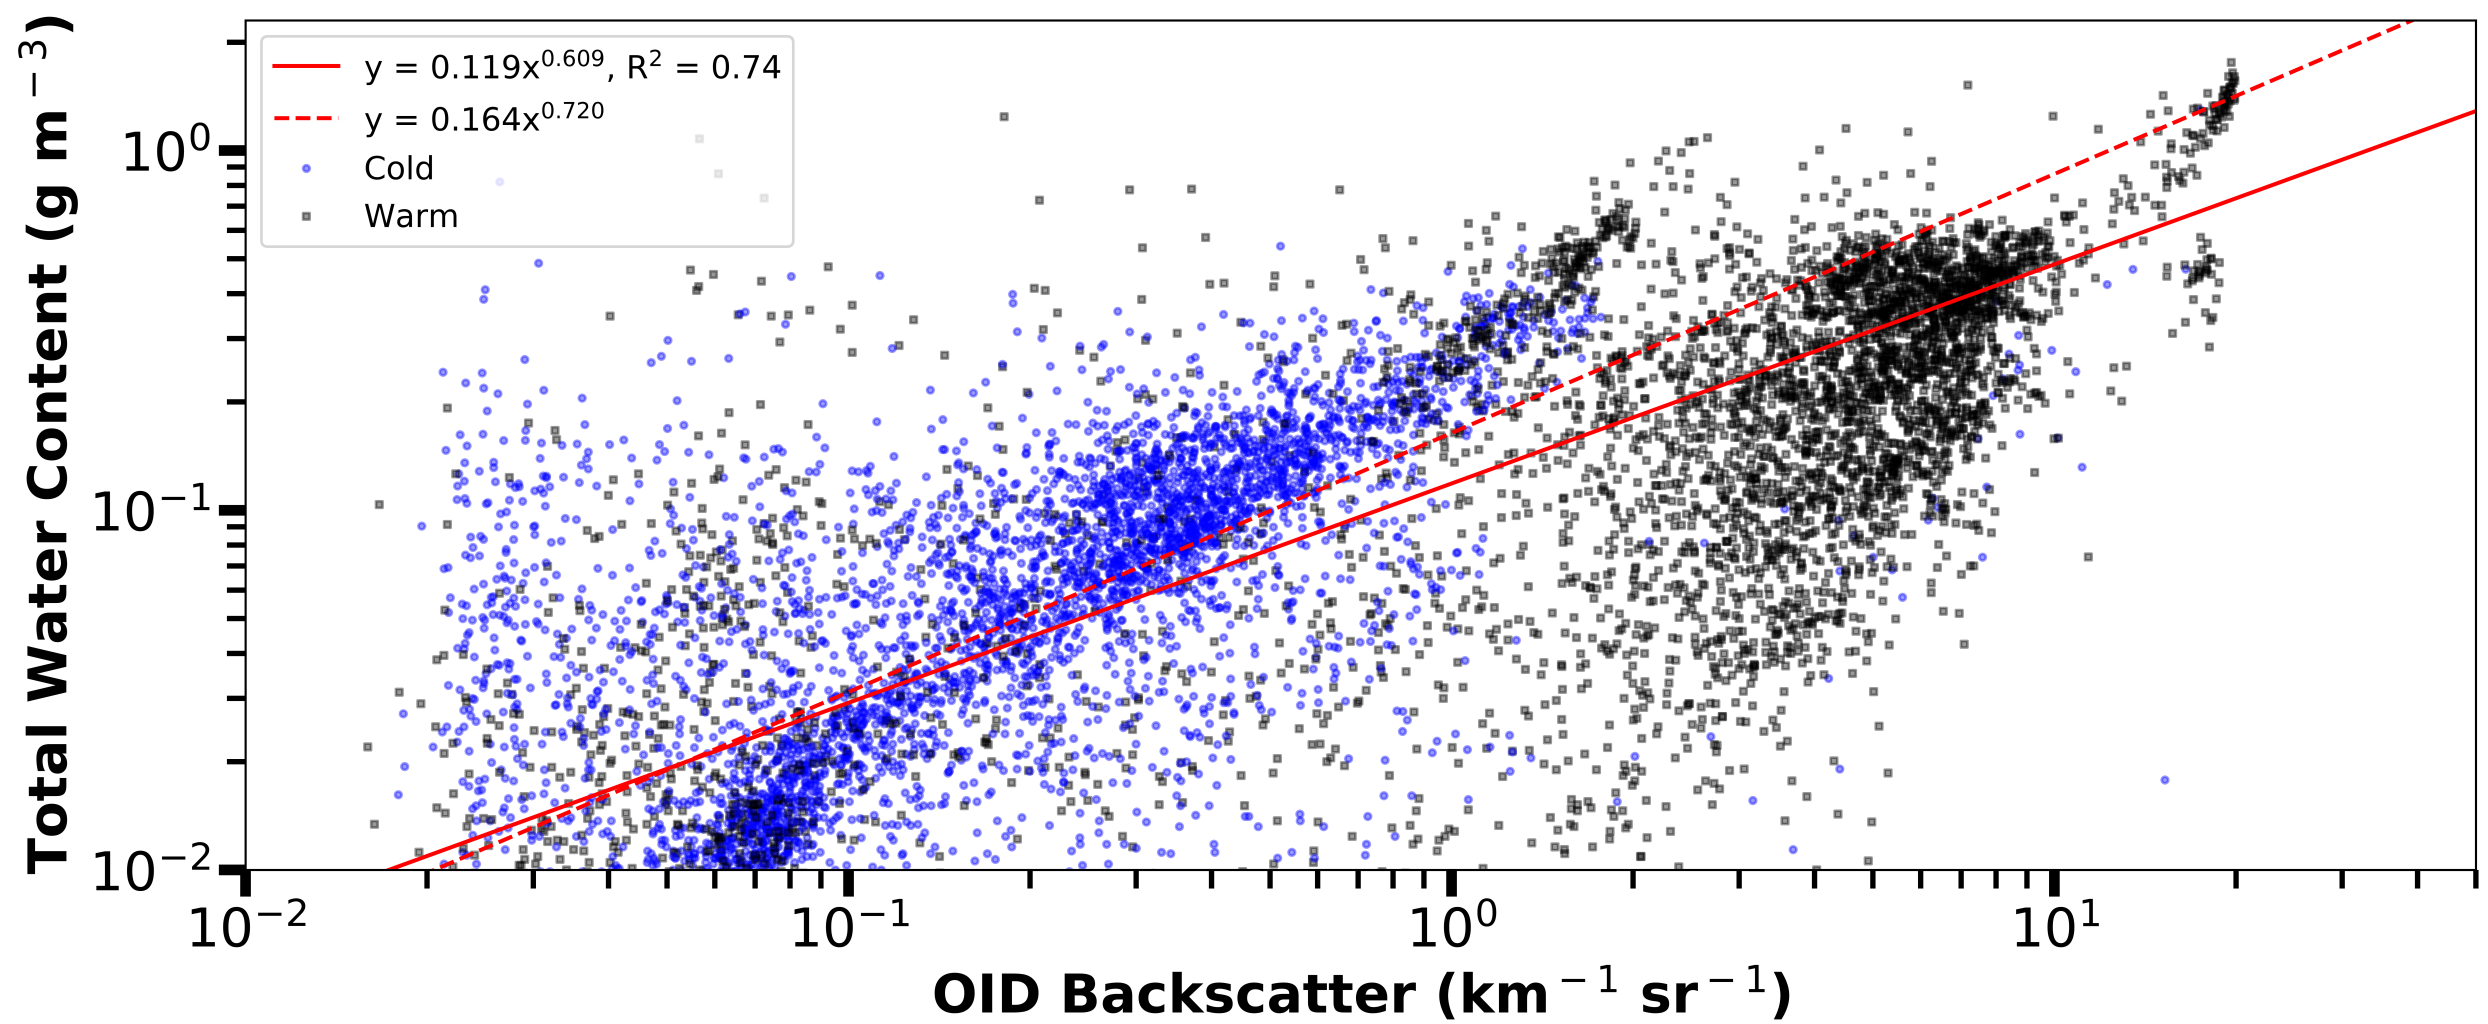

Supplement: Supplementary file [file amt-2022-87-AC2-supplement.pdf]
